# Supplementary material for: Varför lämnar kvinnor chefsrollen
Source: Royal Society of Chemistry journal article supplement (doi:10.1039/c9cp03858b), 2011-01-01
Supplement: c9cp03858b1.pdf [file c9cp03858b1.pdf]

# Closo-carboranes as dual CH- $\pi$ and BH- $\pi$ donors: Theoretical study and biological significance.

A. Frontera<sup>a</sup> and A. Bauzá\*<sup>b</sup>

<sup>a</sup>Department of Chemistry Universitat de les Illes Balears, Crta. de Valldemossa km 7.5, 07122 Palma (Balears), Spain. Fax: +34 971 173426

<sup>b</sup>Department of Chemistry University of Florida, 214 Leigh Hall, 32611, Gainesville, United States. E-mail: toni.bauza@chem.ufl.edu

## Electronic Supplementary Information

### Table of contents

|                              |   |
|------------------------------|---|
| PDB codes .....              | 2 |
| SAPT (Table S1) .....        | 2 |
| Additional AIM analyses..... | 2 |
| FigS2.....                   | 3 |
| Cartesian coordinates.....   | 4 |

**PDB codes:** 3VJT, 3VJS, 4MDG, 4Q78, 4MDL, 4MDM, 2C2S, 2C2T, 1ZTZ, 3I8W, 5E7V, 4Z0L, 5B5J

**TableS1.** SAPT interaction energies ( $E_{\text{total}}$ , kcal/mol) and their partitioning into the electrostatic, exchange, induction, dispersion and contributions ( $E_{\text{ee}}$ ,  $E_{\text{ex}}$ ,  $E_{\text{ind}}$  and  $E_{\text{disp}}$ , respectively, kcal/mol) using the DF-DFT-SAPT approach.

| Complex                  | $E_{\text{ee}}$         | $E_{\text{ex}}$ | $E_{\text{ind}}$        | $E_{\text{disp}}$       | $E_{\text{total}}$ |
|--------------------------|-------------------------|-----------------|-------------------------|-------------------------|--------------------|
| <b>1<sup>CH</sup>BEN</b> | -5.0 (48%) <sup>a</sup> | 6.8             | -0.7 (7%) <sup>a</sup>  | -4.8 (45%) <sup>a</sup> | -3.6               |
| <b>1<sup>CH</sup>HFB</b> | 0.5 (9%) <sup>a</sup>   | 4.6             | -0.5 (10%) <sup>a</sup> | -4.3 (81%) <sup>a</sup> | 0.2                |
| <b>1<sup>BH</sup>TFB</b> | -1.4 (25%) <sup>a</sup> | 4.3             | -0.1 (2%) <sup>a</sup>  | -4.0 (73%) <sup>a</sup> | -1.1               |
| <b>2<sup>CH</sup>TFB</b> | -1.5 (27%) <sup>a</sup> | 4.4             | -0.1 (3%) <sup>a</sup>  | -4.0 (70%) <sup>a</sup> | -1.2               |
| <b>2<sup>BH</sup>HFB</b> | -2.6 (35%) <sup>a</sup> | 5.8             | -0.2 (3%) <sup>a</sup>  | -4.7 (62%) <sup>a</sup> | -1.6               |
| <b>3<sup>CH</sup>BEN</b> | -3.8 (41%) <sup>a</sup> | 6.2             | -0.5 (10%) <sup>a</sup> | -4.9 (49%) <sup>a</sup> | -2.9               |

<sup>a</sup> The percentatges were calculated taking into account only the favorable contributions ( $E_{\text{ee}}$ ,  $E_{\text{ind}}$  and  $E_{\text{disp}}$ ) which are discussed in the main text.

### Additional AIM analyses:

Figure S1 gathers additional AIM analyses regarding the  $\text{CH}\cdots\pi$  and  $\text{BH}\cdots\pi$  complexes described in the main text. As noted, in case of complex **1<sup>CH</sup>@BEN**, both  $\text{CH}\cdots\pi$  and  $\text{BH}\cdots\pi$  interactions are characterized by the presence of two bond CPs connecting the CH and BH bonds of the o-carborane with the C atoms and the C-C bond CPs of the arene moiety, respectively. In complex **1<sup>BH</sup>@HFB**, three symmetrically distributed bond CPs connect the BH bonds of the o-carborane with the C atoms of hexafluorobenzene, thus characterizing the  $\text{BH}\cdots\pi$  interactions. For complex **2<sup>CH</sup>@HFB** concurrent  $\text{CH}\cdots\pi$  and  $\text{BH}\cdots\pi$  interactions are observed, owing to the presence of two bond CPs connecting both CH and BH bonds of the m-carborane to the C atoms of the arene. In complex **2<sup>CH</sup>@TFB**, the  $\text{CH}\cdots\pi$  interaction is characterized by the presence of three symmetrically distributed bond CPs connecting a CH bond of the p-carborane unit with three C atoms of the arene. Finally, in complexes **3<sup>BH</sup>@BEN** and **3<sup>BH</sup>@TFB** the  $\text{BH}\cdots\pi$  interactions are characterized by the presence of three bond CPs connecting the B-H bonds of the p-carborane with the aromatic moieties of benzene and trifluorobenzene, respectively. It is also important to note that in all cases several ring CPs emerge owing to the formation of some supramolecular rings and a cage critical point (with the exception of complex 7, where three of them are observed), which further characterizes the interaction.

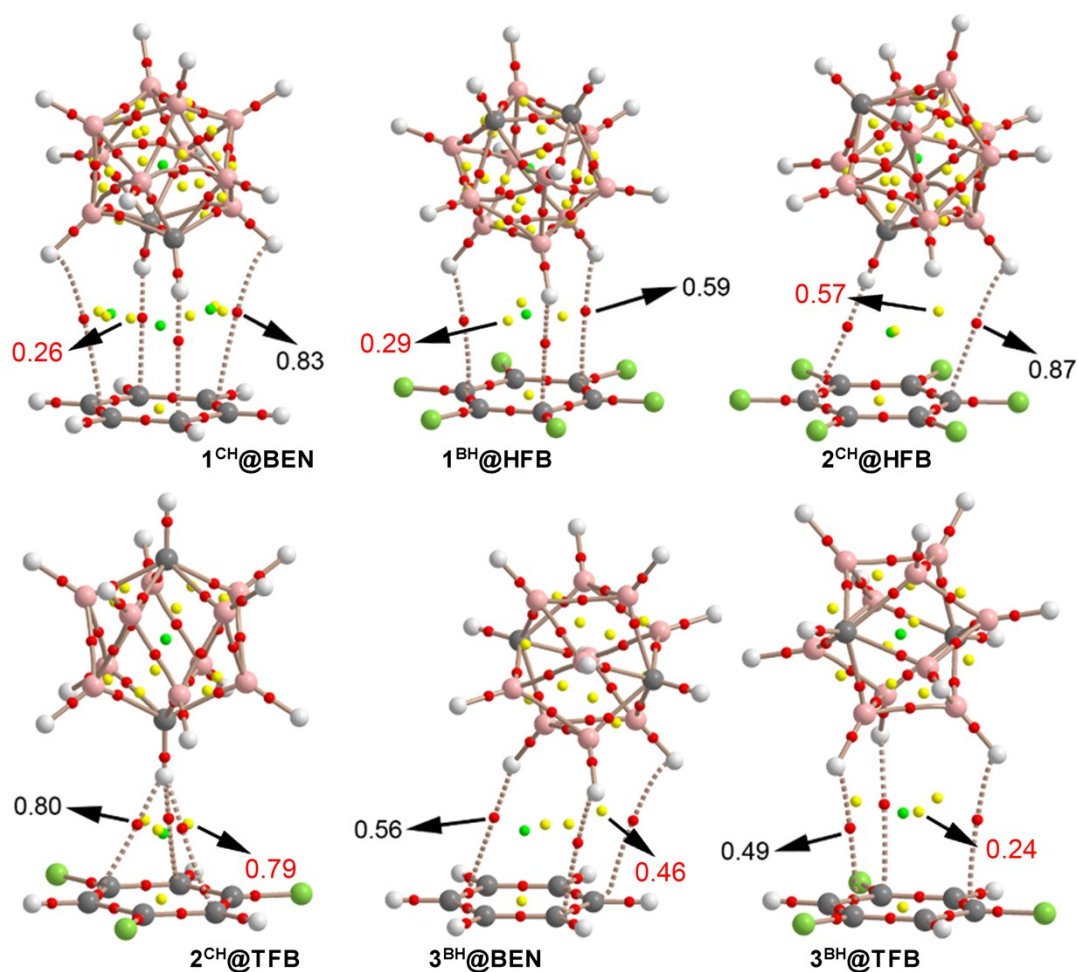

**FigS1.** Distribution of critical points and bond paths in some representative complexes. Bond, ring and cage critical points are denoted by red, yellow and green dots, respectively. The bond paths connecting bond critical points are also represented. The value of the density at the bond and ring (in red) critical points ( $\rho \cdot 10^2$ ) is also indicated.

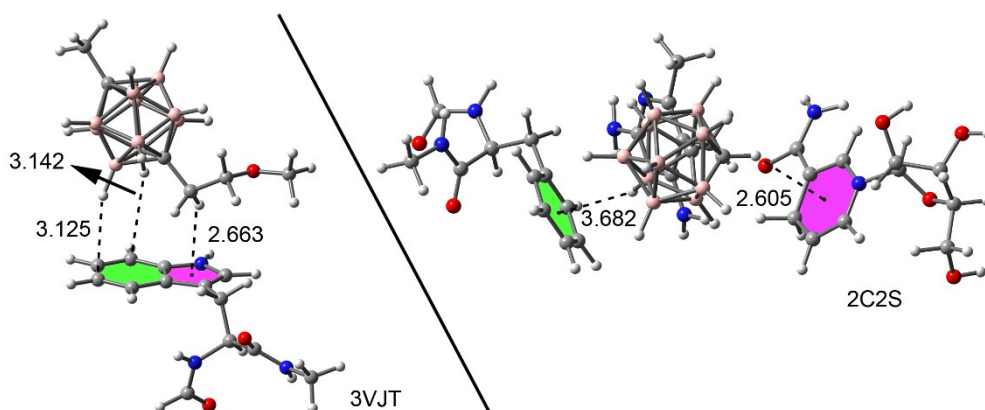

**FigS2.** Theoretical models used to evaluate the  $\text{CH} \cdots \pi$  and  $\text{BH} \cdots \pi$  interactions present in the PDB structures 3VJT and 2C2S. Distances in Å.

## Cartesian coordinates

7.

|   |            |            |            |
|---|------------|------------|------------|
| B | 0.0000000  | 1.4424865  | -0.7645591 |
| B | -1.4322433 | 0.8862414  | -1.6398253 |
| B | -1.4322433 | -0.8862414 | -1.6398253 |
| B | 0.0000000  | -1.4424865 | -0.7645591 |
| B | 1.4322433  | 0.8862414  | -1.6398253 |
| B | 0.0000000  | 1.4455892  | -2.5248609 |
| B | -0.8880322 | 0.0000000  | -3.0743422 |
| B | 0.0000000  | -1.4455892 | -2.5248609 |
| B | 1.4322433  | -0.8862414 | -1.6398253 |
| C | -0.8061790 | 0.0000000  | -0.3482151 |
| H | -1.2680623 | 0.0000000  | 0.6286772  |
| B | 0.8880322  | 0.0000000  | -3.0743422 |
| C | 0.8061790  | 0.0000000  | -0.3482151 |
| H | 1.2680623  | 0.0000000  | 0.6286772  |
| H | -1.5345235 | 0.0000000  | -4.0701890 |
| H | -2.4460285 | 1.4766843  | -1.4715604 |
| H | -2.4460285 | -1.4766843 | -1.4715604 |
| H | 0.0000000  | -2.3215831 | 0.0270487  |
| H | 0.0000000  | -2.4763605 | -3.1131308 |
| H | 2.4460285  | -1.4766843 | -1.4715604 |
| H | 1.5345235  | 0.0000000  | -4.0701890 |
| H | 2.4460285  | 1.4766843  | -1.4715604 |
| H | 0.0000000  | 2.4763605  | -3.1131308 |
| H | 0.0000000  | 2.3215831  | 0.0270487  |
| C | 0.6942016  | 1.2032141  | 3.2410118  |
| C | -0.6942016 | 1.2032141  | 3.2410118  |
| C | -1.3881642 | 0.0000000  | 3.2474361  |

|   |            |            |           |
|---|------------|------------|-----------|
| C | -0.6942016 | -1.2032141 | 3.2410118 |
| C | 0.6942016  | -1.2032141 | 3.2410118 |
| C | 1.3881642  | 0.0000000  | 3.2474361 |
| H | 1.2360247  | 2.1420608  | 3.2384711 |
| H | -1.2360247 | 2.1420608  | 3.2384711 |
| H | -2.4724876 | 0.0000000  | 3.2559406 |
| H | -1.2360247 | -2.1420608 | 3.2384711 |
| H | 1.2360247  | -2.1420608 | 3.2384711 |
| H | 2.4724876  | 0.0000000  | 3.2559406 |

**8.**

|   |            |            |            |
|---|------------|------------|------------|
| B | 0.7773764  | 0.0050001  | 1.4436459  |
| B | 1.6462278  | 1.4418282  | 0.8868125  |
| B | 1.6462278  | 1.4418282  | -0.8868125 |
| B | 0.7773764  | 0.0050001  | -1.4436459 |
| B | 1.6598659  | -1.4232240 | 0.8867309  |
| B | 2.5377458  | 0.0134757  | 1.4459097  |
| B | 3.0828731  | 0.9039904  | 0.0000000  |
| B | 2.5377458  | 0.0134757  | -1.4459097 |
| B | 1.6598659  | -1.4232240 | -0.8867309 |
| C | 0.3585742  | 0.8094845  | 0.0000000  |
| H | -0.6151855 | 1.2757902  | 0.0000000  |
| B | 3.0912368  | -0.8718414 | 0.0000000  |
| C | 0.3660674  | -0.8032270 | 0.0000000  |
| H | -0.6045238 | -1.2776092 | 0.0000000  |
| H | 4.0751871  | 1.5553610  | 0.0000000  |
| H | 1.4713210  | 2.4548374  | 1.4760892  |
| H | 1.4713210  | 2.4548374  | -1.4760892 |
| H | -0.0169150 | 0.0002113  | -2.3208955 |

|   |            |            |            |
|---|------------|------------|------------|
| H | 3.1255928  | 0.0162061  | -2.4765804 |
| H | 1.4944281  | -2.4376513 | -1.4762511 |
| H | 4.0895573  | -1.5139505 | 0.0000000  |
| H | 1.4944281  | -2.4376513 | 1.4762511  |
| H | 3.1255928  | 0.0162061  | 2.4765804  |
| H | -0.0169150 | 0.0002113  | 2.3208955  |
| C | -3.2760605 | 0.6835080  | 1.2160504  |
| C | -3.2760605 | 0.6835080  | -1.2160504 |
| C | -3.2600027 | -1.4206639 | 0.0000000  |
| H | -3.2778095 | 1.2245417  | 2.1521257  |
| H | -3.2778095 | 1.2245417  | -2.1521257 |
| H | -3.2596946 | -2.5020598 | 0.0000000  |
| C | -3.2642626 | -0.6986198 | -1.1799199 |
| C | -3.2877221 | 1.3418384  | 0.0000000  |
| C | -3.2642626 | -0.6986198 | 1.1799199  |
| F | -3.2498321 | -1.3656926 | -2.3308023 |
| F | -3.2917235 | 2.6740459  | 0.0000000  |
| F | -3.2498321 | -1.3656926 | 2.3308023  |

**9.**

|   |            |            |            |
|---|------------|------------|------------|
| B | 0.0000000  | 1.4441307  | -0.7814610 |
| B | -1.4329914 | 0.8872152  | -1.6579444 |
| B | -1.4329914 | -0.8872152 | -1.6579444 |
| B | 0.0000000  | -1.4441307 | -0.7814610 |
| B | 1.4329914  | 0.8872152  | -1.6579444 |
| B | 0.0000000  | 1.4464975  | -2.5418731 |
| B | -0.8878605 | 0.0000000  | -3.0914687 |
| B | 0.0000000  | -1.4464975 | -2.5418731 |
| B | 1.4329914  | -0.8872152 | -1.6579444 |

|   |            |            |            |
|---|------------|------------|------------|
| C | -0.8069483 | 0.0000000  | -0.3680099 |
| H | -1.2851768 | 0.0000000  | 0.5998468  |
| B | 0.8878605  | 0.0000000  | -3.0914687 |
| C | 0.8069483  | 0.0000000  | -0.3680099 |
| H | 1.2851768  | 0.0000000  | 0.5998468  |
| H | -1.5347889 | 0.0000000  | -4.0864540 |
| H | -2.4461827 | 1.4765892  | -1.4861225 |
| H | -2.4461827 | -1.4765892 | -1.4861225 |
| H | 0.0000000  | -2.3204391 | 0.0145185  |
| H | 0.0000000  | -2.4770331 | -3.1295188 |
| H | 2.4461827  | -1.4765892 | -1.4861225 |
| H | 1.5347889  | 0.0000000  | -4.0864540 |
| H | 2.4461827  | 1.4765892  | -1.4861225 |
| H | 0.0000000  | 2.4770331  | -3.1295188 |
| H | 0.0000000  | 2.3204391  | 0.0145185  |
| C | 0.6933820  | 1.2022056  | 3.2834009  |
| C | -0.6933820 | 1.2022056  | 3.2834009  |
| C | -1.3852572 | 0.0000000  | 3.2861653  |
| C | -0.6933820 | -1.2022056 | 3.2834009  |
| C | 0.6933820  | -1.2022056 | 3.2834009  |
| C | 1.3852572  | 0.0000000  | 3.2861653  |
| F | 1.3560137  | -2.3438404 | 3.2722833  |
| F | 2.7069546  | 0.0000000  | 3.2750204  |
| F | 1.3560137  | 2.3438404  | 3.2722833  |
| F | -1.3560137 | 2.3438404  | 3.2722833  |
| F | -2.7069546 | 0.0000000  | 3.2750204  |
| F | -1.3560137 | -2.3438404 | 3.2722833  |

10.

|   |            |            |            |
|---|------------|------------|------------|
| B | 3.0838908  | -1.0258919 | 0.0000000  |
| B | 2.0732233  | -0.7865301 | -1.4320100 |
| B | 1.4885088  | 0.8869063  | -1.4318497 |
| B | 2.1308714  | 1.7026984  | 0.0000000  |
| B | 2.0732233  | -0.7865301 | 1.4320100  |
| B | 1.4225262  | -1.6053013 | 0.0000000  |
| B | 0.4273765  | -0.4223624 | -0.8874405 |
| B | 0.4700766  | 1.1230098  | 0.0000000  |
| B | 1.4885088  | 0.8869063  | 1.4318497  |
| C | 3.0007186  | 0.4758567  | -0.8050833 |
| H | 3.9157578  | 0.7956999  | -1.2820575 |
| B | 0.4273765  | -0.4223624 | 0.8874405  |
| C | 3.0007186  | 0.4758567  | 0.8050833  |
| H | 3.9157578  | 0.7956999  | 1.2820575  |
| H | -0.5124371 | -0.7495696 | -1.5326670 |
| H | 2.4287853  | -1.2855990 | -2.4461930 |
| H | 1.4564603  | 1.4986376  | -2.4460052 |
| H | 2.5901237  | 2.7927495  | 0.0000000  |
| H | -0.4242161 | 1.9019931  | 0.0000000  |
| H | 1.4564603  | 1.4986376  | 2.4460052  |
| H | -0.5124371 | -0.7495696 | 1.5326670  |
| H | 2.4287853  | -1.2855990 | 2.4461930  |
| H | 1.2078414  | -2.7724758 | 0.0000000  |
| H | 4.1217374  | -1.5933066 | 0.0000000  |
| C | -3.6706720 | -0.8022155 | -1.2016953 |
| C | -3.7404535 | -1.4925772 | 0.0000000  |
| C | -3.6706720 | -0.8022155 | 1.2016953  |
| C | -3.5300119 | 0.5781266  | 1.2016776  |
| C | -3.4597018 | 1.2680133  | 0.0000000  |



|   |            |            |            |
|---|------------|------------|------------|
| C | -3.5300119 | 0.5781266  | -1.2016776 |
| H | -3.7186676 | -1.3422373 | -2.1405851 |
| H | -3.8443781 | -2.5716658 | 0.0000000  |
| H | -3.7186676 | -1.3422373 | 2.1405851  |
| H | -3.4670759 | 1.1168269  | 2.1404409  |
| H | -3.3422501 | 2.3456744  | 0.0000000  |
| H | -3.4670759 | 1.1168269  | -2.1404409 |

**11.**

|   |            |            |            |
|---|------------|------------|------------|
| B | -2.9826900 | -1.1518459 | 0.0000000  |
| B | -1.9808195 | -0.8799360 | 1.4320942  |
| B | -1.4499941 | 0.8117640  | 1.4319503  |
| B | -2.1180189 | 1.6066350  | 0.0000000  |
| B | -1.9808195 | -0.8799360 | -1.4320942 |
| B | -1.3037767 | -1.6775995 | 0.0000000  |
| B | -0.3485030 | -0.4631142 | 0.8872848  |
| B | -0.4392438 | 1.0802696  | 0.0000000  |
| B | -1.4499941 | 0.8117640  | -1.4319503 |
| C | -2.9476508 | 0.3520120  | 0.8050100  |
| H | -3.8724266 | 0.6421548  | 1.2823105  |
| B | -0.3485030 | -0.4631142 | -0.8872848 |
| C | -2.9476508 | 0.3520120  | -0.8050100 |
| H | -3.8724266 | 0.6421548  | -1.2823105 |
| H | 0.5967527  | -0.7626759 | 1.5381678  |
| H | -2.3184061 | -1.3900550 | 2.4466326  |
| H | -1.4358261 | 1.4236863  | 2.4461250  |
| H | -2.6114645 | 2.6814055  | 0.0000000  |
| H | 0.4271808  | 1.8909660  | 0.0000000  |
| H | -1.4358261 | 1.4236863  | -2.4461250 |

|   |            |            |            |
|---|------------|------------|------------|
| H | 0.5967527  | -0.7626759 | -1.5381678 |
| H | -2.3184061 | -1.3900550 | -2.4466326 |
| H | -1.0501023 | -2.8367184 | 0.0000000  |
| H | -4.0012933 | -1.7526318 | 0.0000000  |
| C | 3.5448197  | -1.3420633 | 0.0000000  |
| C | 3.5071155  | -0.6208007 | -1.1772518 |
| C | 3.4373283  | 0.7582692  | -1.2143701 |
| C | 3.4014293  | 1.4154667  | 0.0000000  |
| C | 3.4373283  | 0.7582692  | 1.2143701  |
| C | 3.5071155  | -0.6208007 | 1.1772518  |
| H | 3.5857992  | -2.4219967 | 0.0000000  |
| H | 3.3962228  | 1.2973581  | -2.1502595 |
| H | 3.3962228  | 1.2973581  | 2.1502595  |
| F | 3.5296437  | -1.2883212 | -2.3320352 |
| F | 3.5296437  | -1.2883212 | 2.3320352  |
| F | 3.3204866  | 2.7474301  | 0.0000000  |

**12.**

|   |           |            |            |
|---|-----------|------------|------------|
| B | 2.7966872 | -1.4286942 | 0.0000000  |
| B | 1.8373211 | -1.0324271 | -1.4328718 |
| B | 1.5249097 | 0.7140725  | -1.4331330 |
| B | 2.2889550 | 1.4179038  | 0.0000000  |
| B | 1.8373211 | -1.0324271 | 1.4328718  |
| B | 1.0641832 | -1.7383026 | 0.0000000  |
| B | 0.2719537 | -0.4116785 | -0.8874373 |
| B | 0.5569450 | 1.1080038  | 0.0000000  |
| B | 1.5249097 | 0.7140725  | 1.4331330  |
| C | 2.9519487 | 0.0678988  | -0.8054056 |
| H | 3.9061558 | 0.2378264  | -1.2828644 |

|   |            |            |            |
|---|------------|------------|------------|
| B | 0.2719537  | -0.4116785 | 0.8874373  |
| C | 2.9519487  | 0.0678988  | 0.8054056  |
| H | 3.9061558  | 0.2378264  | 1.2828644  |
| H | -0.7032240 | -0.5900810 | -1.5396293 |
| H | 2.1067336  | -1.5818727 | -2.4470726 |
| H | 1.5858489  | 1.3233230  | -2.4467647 |
| H | 2.9129228  | 2.4221994  | 0.0000000  |
| H | -0.1973339 | 2.0237644  | 0.0000000  |
| H | 1.5858489  | 1.3233230  | 2.4467647  |
| H | -0.7032240 | -0.5900810 | 1.5396293  |
| H | 2.1067336  | -1.5818727 | 2.4470726  |
| H | 0.6641193  | -2.8551593 | 0.0000000  |
| H | 3.7310864  | -2.1536748 | 0.0000000  |
| C | -3.5627001 | -0.3603055 | -1.1995194 |
| C | -3.7196693 | -1.0354312 | 0.0000000  |
| C | -3.5627001 | -0.3603055 | 1.1995194  |
| C | -3.2492875 | 0.9888293  | 1.1993720  |
| C | -3.0949017 | 1.6642354  | 0.0000000  |
| C | -3.2492875 | 0.9888293  | -1.1993720 |
| F | -4.0067773 | -2.3267268 | 0.0000000  |
| F | -3.0793828 | 1.6272347  | -2.3454258 |
| F | -3.0793828 | 1.6272347  | 2.3454258  |
| F | -3.6951452 | -1.0071246 | 2.3458395  |
| F | -2.7864804 | 2.9504913  | 0.0000000  |
| F | -3.6951452 | -1.0071246 | -2.3458395 |

**13.**

|   |           |           |           |
|---|-----------|-----------|-----------|
| B | 0.8868468 | 1.2282070 | 0.8858752 |
| B | 2.3877694 | 0.4932784 | 1.4368795 |

|   |            |            |            |
|---|------------|------------|------------|
| B | 3.3159198  | 0.0310520  | 0.0000000  |
| B | 2.3877694  | 0.4932784  | -1.4368795 |
| B | 0.8896391  | -0.4410733 | 1.4353343  |
| B | 2.4010294  | -1.1941616 | 0.8918695  |
| B | 2.4010294  | -1.1941616 | -0.8918695 |
| B | 0.8896391  | -0.4410733 | -1.4353343 |
| C | 2.3100146  | 1.4010654  | 0.0000000  |
| H | 2.7734450  | 2.3776380  | 0.0000000  |
| B | 0.8978744  | -1.4766538 | 0.0000000  |
| H | 0.3278631  | 2.1227457  | -1.4194983 |
| H | 2.9325254  | -2.0422462 | 1.5295201  |
| H | 2.9270160  | 0.9480227  | 2.3887018  |
| H | 4.4917703  | 0.1792793  | 0.0000000  |
| H | 2.9270160  | 0.9480227  | -2.3887018 |
| H | 2.9325254  | -2.0422462 | -1.5295201 |
| H | 0.2432733  | -0.7244948 | -2.3870085 |
| H | 0.2473561  | -2.4672042 | 0.0000000  |
| H | 0.2432733  | -0.7244948 | 2.3870085  |
| H | 0.3278631  | 2.1227457  | 1.4194983  |
| C | 0.1105010  | 0.0275720  | 0.0000000  |
| H | -0.9695820 | 0.0404029  | 0.0000000  |
| B | 0.8868468  | 1.2282070  | -0.8858752 |
| C | -3.3379369 | 1.3123623  | 0.0000000  |
| C | -3.3033970 | 0.6188003  | -1.2027245 |
| C | -3.2338621 | -0.7681561 | -1.2026010 |
| C | -3.1988444 | -1.4614758 | 0.0000000  |
| C | -3.2338621 | -0.7681561 | 1.2026010  |
| C | -3.3033970 | 0.6188003  | 1.2027245  |
| H | -3.3853084 | 2.3952552  | 0.0000000  |

|   |            |            |            |
|---|------------|------------|------------|
| H | -3.3229114 | 1.1602291  | -2.1415972 |
| H | -3.1967425 | -1.3091996 | -2.1410448 |
| H | -3.1333084 | -2.5431963 | 0.0000000  |
| H | -3.1967425 | -1.3091996 | 2.1410448  |
| H | -3.3229114 | 1.1602291  | 2.1415972  |

**14.**

|   |           |            |            |
|---|-----------|------------|------------|
| B | 0.9332406 | 1.2276018  | 0.8865789  |
| B | 2.4116912 | 0.4490132  | 1.4371954  |
| B | 3.3256139 | -0.0396938 | 0.0000000  |
| B | 2.4116912 | 0.4490132  | -1.4371954 |
| B | 0.8876167 | -0.4422453 | 1.4359543  |
| B | 2.3760401 | -1.2386291 | 0.8919706  |
| B | 2.3760401 | -1.2386291 | -0.8919706 |
| B | 0.8876167 | -0.4422453 | -1.4359543 |
| C | 2.3595468 | 1.3592040  | 0.0000000  |
| H | 2.8508504 | 2.3220707  | 0.0000000  |
| B | 0.8655315 | -1.4785800 | 0.0000000  |
| H | 0.3969840 | 2.1359961  | -1.4200888 |
| H | 2.8825343 | -2.1013844 | 1.5298515  |
| H | 2.9630651 | 0.8877863  | 2.3892717  |
| H | 4.5050067 | 0.0746035  | 0.0000000  |
| H | 2.9630651 | 0.8877863  | -2.3892717 |
| H | 2.8825343 | -2.1013844 | -1.5298515 |
| H | 0.2312864 | -0.7057555 | -2.3865663 |
| H | 0.1837837 | -2.4479583 | 0.0000000  |
| H | 0.2312864 | -0.7057555 | 2.3865663  |
| H | 0.3969840 | 2.1359961  | 1.4200888  |
| C | 0.1245544 | 0.0490899  | 0.0000000  |

|   |            |            |            |
|---|------------|------------|------------|
| H | -0.9538225 | 0.0941168  | 0.0000000  |
| B | 0.9332406  | 1.2276018  | -0.8865789 |
| C | -3.3509950 | 1.3713565  | 0.0000000  |
| C | -3.3207544 | 0.6496496  | -1.1792126 |
| C | -3.2605720 | -0.7311215 | -1.2154474 |
| C | -3.2334339 | -1.3905634 | 0.0000000  |
| C | -3.2605720 | -0.7311215 | 1.2154474  |
| C | -3.3207544 | 0.6496496  | 1.1792126  |
| H | -3.3900453 | 2.4515686  | 0.0000000  |
| H | -3.2252650 | -1.2712197 | -2.1512194 |
| H | -3.2252650 | -1.2712197 | 2.1512194  |
| F | -3.3357744 | 1.3173563  | 2.3313829  |
| F | -3.1667762 | -2.7193101 | 0.0000000  |
| F | -3.3357744 | 1.3173563  | -2.3313829 |

**15.**

|   |           |            |            |
|---|-----------|------------|------------|
| B | 1.0962121 | 1.3930906  | 0.8870041  |
| B | 2.4509750 | 0.4160257  | 1.4372424  |
| B | 3.2878554 | -0.1947249 | 0.0000000  |
| B | 2.4509750 | 0.4160257  | -1.4372424 |
| B | 0.8174770 | -0.2544056 | 1.4363855  |
| B | 2.1806880 | -1.2495130 | 0.8919530  |
| B | 2.1806880 | -1.2495130 | -0.8919530 |
| B | 0.8174770 | -0.2544056 | -1.4363855 |
| C | 2.5257726 | 1.3243552  | 0.0000000  |
| H | 3.1452748 | 2.2102600  | 0.0000000  |
| B | 0.6538685 | -1.2770661 | 0.0000000  |
| H | 0.6909885 | 2.3673771  | -1.4195100 |
| H | 2.5600433 | -2.1749744 | 1.5298422  |

|   |            |            |            |
|---|------------|------------|------------|
| H | 3.0574916  | 0.7733659  | 2.3896052  |
| H | 4.4714216  | -0.2463483 | 0.0000000  |
| H | 3.0574916  | 0.7733659  | -2.3896052 |
| H | 2.5600433  | -2.1749744 | -1.5298422 |
| H | 0.1292900  | -0.4251800 | -2.3856252 |
| H | -0.1497862 | -2.1481462 | 0.0000000  |
| H | 0.1292900  | -0.4251800 | 2.3856252  |
| H | 0.6909885  | 2.3673771  | 1.4195100  |
| C | 0.1311462  | 0.3387928  | 0.0000000  |
| H | -0.9301033 | 0.5377019  | 0.0000000  |
| B | 1.0962121  | 1.3930906  | -0.8870041 |
| C | -3.5062717 | 1.1779911  | 0.0000000  |
| C | -3.3823479 | 0.4953338  | -1.2012391 |
| C | -3.1397395 | -0.8701305 | -1.2010412 |
| C | -3.0227751 | -1.5535836 | 0.0000000  |
| C | -3.1397395 | -0.8701305 | 1.2010412  |
| C | -3.3823479 | 0.4953338  | 1.2012391  |
| F | -3.4878260 | 1.1477833  | 2.3455413  |
| F | -2.7939425 | -2.8530122 | 0.0000000  |
| F | -3.4878260 | 1.1477833  | -2.3455413 |
| F | -3.0137187 | -1.5172182 | -2.3448463 |
| F | -3.7315271 | 2.4806707  | 0.0000000  |
| F | -3.0137187 | -1.5172182 | 2.3448463  |

**16.**

|   |            |            |            |
|---|------------|------------|------------|
| B | -2.8606993 | 0.6320680  | -0.8872280 |
| B | -2.2397056 | -0.9189436 | -1.4368818 |
| B | -1.8486927 | -1.8787866 | 0.0000000  |
| B | -2.2397056 | -0.9189436 | 1.4368818  |

|   |            |            |            |
|---|------------|------------|------------|
| B | -1.1935105 | 0.5035876  | -1.4360310 |
| B | -0.5578543 | -1.0586513 | -0.8912998 |
| B | -0.5578543 | -1.0586513 | 0.8912998  |
| B | -1.1935105 | 0.5035876  | 1.4360310  |
| C | -3.1397722 | -0.7719257 | 0.0000000  |
| H | -4.1487314 | -1.1597715 | 0.0000000  |
| B | -0.1585788 | 0.4190570  | 0.0000000  |
| H | -3.7111790 | 1.2559772  | 1.4210324  |
| H | 0.2465581  | -1.6525116 | -1.5299520 |
| H | -2.7341933 | -1.4216995 | -2.3887088 |
| H | -2.0859979 | -3.0399816 | 0.0000000  |
| H | -2.7341933 | -1.4216995 | 2.3887088  |
| H | 0.2465581  | -1.6525116 | 1.5299520  |
| H | -0.8625586 | 1.1252367  | 2.3886163  |
| H | 0.8739069  | 0.9951834  | 0.0000000  |
| H | -0.8625586 | 1.1252367  | -2.3886163 |
| H | -3.7111790 | 1.2559772  | -1.4210324 |
| C | -1.6036221 | 1.3168828  | 0.0000000  |
| H | -1.5340503 | 2.3955331  | 0.0000000  |
| B | -2.8606993 | 0.6320680  | 0.8872280  |
| C | 3.7301666  | 1.7601711  | 0.0000000  |
| C | 3.5949720  | 1.0793582  | 1.2020752  |
| C | 3.3249118  | -0.2818928 | 1.2016824  |
| C | 3.1899345  | -0.9621247 | 0.0000000  |
| C | 3.3249118  | -0.2818928 | -1.2016824 |
| C | 3.5949720  | 1.0793582  | -1.2020752 |
| H | 3.9378274  | 2.8243036  | 0.0000000  |
| H | 3.6954365  | 1.6118039  | 2.1411361  |
| H | 3.2092443  | -0.8124528 | 2.1399398  |



|   |           |            |            |
|---|-----------|------------|------------|
| H | 2.9647655 | -2.0223008 | 0.0000000  |
| H | 3.2092443 | -0.8124528 | -2.1399398 |
| H | 3.6954365 | 1.6118039  | -2.1411361 |

**17.**

|   |            |            |            |
|---|------------|------------|------------|
| B | -2.9881509 | 0.5922656  | -0.8869947 |
| B | -2.1034241 | -0.8249084 | -1.4365423 |
| B | -1.5490767 | -1.7005347 | 0.0000000  |
| B | -2.1034241 | -0.8249084 | 1.4365423  |
| B | -1.3250940 | 0.7599176  | -1.4365386 |
| B | -0.4235501 | -0.6660836 | -0.8918574 |
| B | -0.4235501 | -0.6660836 | 0.8918574  |
| B | -1.3250940 | 0.7599176  | 1.4365386  |
| C | -3.0147475 | -0.8390920 | 0.0000000  |
| H | -3.9397706 | -1.3983855 | 0.0000000  |
| B | -0.2930925 | 0.8574008  | 0.0000000  |
| H | -3.9345517 | 1.0574066  | 1.4209222  |
| H | 0.4697201  | -1.1083592 | -1.5340029 |
| H | -2.4998165 | -1.4065434 | -2.3891524 |
| H | -1.5757611 | -2.8851090 | 0.0000000  |
| H | -2.4998165 | -1.4065434 | 2.3891524  |
| H | 0.4697201  | -1.1083592 | 1.5340029  |
| H | -1.1086659 | 1.4298200  | 2.3889993  |
| H | 0.6246173  | 1.6058414  | 0.0000000  |
| H | -1.1086659 | 1.4298200  | -2.3889993 |
| H | -3.9345517 | 1.0574066  | -1.4209222 |
| C | -1.8714750 | 1.4886341  | 0.0000000  |
| H | -1.9950200 | 2.5626317  | 0.0000000  |
| B | -2.9881509 | 0.5922656  | 0.8869947  |

|   |           |            |            |
|---|-----------|------------|------------|
| C | 3.5915994 | 1.4057431  | 0.0000000  |
| C | 3.5280072 | 0.7506968  | 1.2145090  |
| C | 3.3919350 | -0.6237670 | 1.1774051  |
| C | 3.3222948 | -1.3423371 | 0.0000000  |
| C | 3.3919350 | -0.6237670 | -1.1774051 |
| C | 3.5280072 | 0.7506968  | -1.2145090 |
| H | 3.5709890 | 1.2892863  | 2.1506331  |
| H | 3.2008631 | -2.4162045 | 0.0000000  |
| H | 3.5709890 | 1.2892863  | -2.1506331 |
| F | 3.7106448 | 2.7351498  | 0.0000000  |
| F | 3.3170637 | -1.2866003 | -2.3322165 |
| F | 3.3170637 | -1.2866003 | 2.3322165  |

**18.**

|   |            |            |            |
|---|------------|------------|------------|
| B | -2.9144876 | 0.7356493  | -0.8873182 |
| B | -2.1050613 | -0.7262668 | -1.4369568 |
| B | -1.5972595 | -1.6301620 | 0.0000000  |
| B | -2.1050613 | -0.7262668 | 1.4369568  |
| B | -1.2452415 | 0.8160795  | -1.4375861 |
| B | -0.4197754 | -0.6551260 | -0.8914860 |
| B | -0.4197754 | -0.6551260 | 0.8914860  |
| B | -1.2452415 | 0.8160795  | 1.4375861  |
| C | -3.0153929 | -0.6926455 | 0.0000000  |
| H | -3.9681631 | -1.2033499 | 0.0000000  |
| B | -0.2122607 | 0.8597729  | 0.0000000  |
| H | -3.8347990 | 1.2497593  | 1.4214558  |
| H | 0.4481955  | -1.1455072 | -1.5341918 |
| H | -2.5304785 | -1.2862574 | -2.3896596 |
| H | -1.6845334 | -2.8114319 | 0.0000000  |

|   |            |            |            |
|---|------------|------------|------------|
| H | -2.5304785 | -1.2862574 | 2.3896596  |
| H | 0.4481955  | -1.1455072 | 1.5341918  |
| H | -0.9917121 | 1.4736524  | 2.3892386  |
| H | 0.7409036  | 1.5623812  | 0.0000000  |
| H | -0.9917121 | 1.4736524  | -2.3892386 |
| H | -3.8347990 | 1.2497593  | -1.4214558 |
| C | -1.7529704 | 1.5725409  | 0.0000000  |
| H | -1.8188726 | 2.6515715  | 0.0000000  |
| B | -2.9144876 | 0.7356493  | 0.8873182  |
| C | 3.5575357  | 1.2695727  | 0.0000000  |
| C | 3.4701328  | 0.5831018  | 1.1998811  |
| C | 3.2971574  | -0.7913500 | 1.1998362  |
| C | 3.2096541  | -1.4782788 | 0.0000000  |
| C | 3.2971574  | -0.7913500 | -1.1998362 |
| C | 3.4701328  | 0.5831018  | -1.1998811 |
| F | 3.7012045  | 2.5851964  | 0.0000000  |
| F | 3.2001121  | -1.4456198 | -2.3449018 |
| F | 3.2001121  | -1.4456198 | 2.3449018  |
| F | 3.5333826  | 1.2429582  | -2.3449299 |
| F | 3.5333826  | 1.2429582  | 2.3449299  |
| F | 3.0253047  | -2.7873139 | 0.0000000  |

**19.**

|   |           |            |            |
|---|-----------|------------|------------|
| B | 2.3695365 | -1.2251071 | -0.8872032 |
| B | 2.3695365 | -1.2251071 | 0.8872032  |
| B | 2.3838217 | 0.4624390  | 1.4354800  |
| B | 2.3925657 | 1.5055427  | 0.0000000  |
| B | 0.8803630 | -0.4572444 | -1.4339139 |
| B | 0.8716232 | -1.4992454 | 0.0000000  |

|   |            |            |            |
|---|------------|------------|------------|
| B | 0.8803630  | -0.4572444 | 1.4339139  |
| B | 0.8946023  | 1.2285662  | 0.8863138  |
| B | 0.8946023  | 1.2285662  | -0.8863138 |
| C | 3.1532256  | -0.0104391 | 0.0000000  |
| H | 4.2343902  | -0.0195872 | 0.0000000  |
| H | 3.0161278  | 0.7667212  | -2.3895313 |
| H | 0.2482101  | -0.7616078 | 2.3881187  |
| H | 2.9923409  | -2.0415758 | 1.4769510  |
| H | 3.0161278  | 0.7667212  | 2.3895313  |
| H | 3.0305854  | 2.5030602  | 0.0000000  |
| H | 0.2722345  | 2.0451469  | 1.4760989  |
| H | 0.2722345  | 2.0451469  | -1.4760989 |
| H | 0.2482101  | -0.7616078 | -2.3881187 |
| H | 0.2338824  | -2.4968616 | 0.0000000  |
| H | 2.9923409  | -2.0415758 | -1.4769510 |
| C | 0.1131705  | 0.0151002  | 0.0000000  |
| H | -0.9670085 | 0.0237844  | 0.0000000  |
| B | 2.3838217  | 0.4624390  | -1.4354800 |
| C | -3.2585258 | -1.3932616 | 0.0000000  |
| C | -3.2643158 | -0.6990212 | -1.2025904 |
| C | -3.2753138 | 0.6895898  | -1.2026324 |
| C | -3.2805862 | 1.3838447  | 0.0000000  |
| C | -3.2753138 | 0.6895898  | 1.2026324  |
| C | -3.2643158 | -0.6990212 | 1.2025904  |
| H | -3.2394925 | -2.4768909 | 0.0000000  |
| H | -3.2501953 | -1.2409477 | -2.1412232 |
| H | -3.2698359 | 1.2316783  | -2.1412437 |
| H | -3.2789819 | 2.4676786  | 0.0000000  |
| H | -3.2698359 | 1.2316783  | 2.1412437  |

|            |            |            |            |
|------------|------------|------------|------------|
| H          | -3.2501953 | -1.2409477 | 2.1412232  |
| <b>20.</b> |            |            |            |
| B          | 2.3796671  | -1.2267302 | -0.8873925 |
| B          | 2.3796671  | -1.2267302 | 0.8873925  |
| B          | 2.3943142  | 0.4614357  | 1.4357033  |
| B          | 2.4032066  | 1.5050182  | 0.0000000  |
| B          | 0.8912832  | -0.4583441 | -1.4345713 |
| B          | 0.8820251  | -1.5013428 | 0.0000000  |
| B          | 0.8912832  | -0.4583441 | 1.4345713  |
| B          | 0.9057525  | 1.2286806  | 0.8868870  |
| B          | 0.9057525  | 1.2286806  | -0.8868870 |
| C          | 3.1629533  | -0.0117700 | 0.0000000  |
| H          | 4.2441415  | -0.0210863 | 0.0000000  |
| H          | 3.0259334  | 0.7654501  | -2.3899948 |
| H          | 0.2570362  | -0.7619086 | 2.3876675  |
| H          | 3.0020365  | -2.0430683 | 1.4772343  |
| H          | 3.0259334  | 0.7654501  | 2.3899948  |
| H          | 3.0411563  | 2.5022973  | 0.0000000  |
| H          | 0.2807231  | 2.0434473  | 1.4764120  |
| H          | 0.2807231  | 2.0434473  | -1.4764120 |
| H          | 0.2570362  | -0.7619086 | -2.3876675 |
| H          | 0.2409841  | -2.4968423 | 0.0000000  |
| H          | 3.0020365  | -2.0430683 | -1.4772343 |
| C          | 0.1263895  | 0.0145597  | 0.0000000  |
| H          | -0.9529176 | 0.0235928  | 0.0000000  |
| B          | 2.3943142  | 0.4614357  | -1.4357033 |
| C          | -3.2744452 | -1.3641453 | 0.0000000  |
| C          | -3.2810038 | -0.7044203 | -1.2153191 |

|   |            |            |            |
|---|------------|------------|------------|
| C | -3.2984654 | 0.6778077  | -1.1790636 |
| C | -3.3060264 | 1.3999690  | 0.0000000  |
| C | -3.2984654 | 0.6778077  | 1.1790636  |
| C | -3.2810038 | -0.7044203 | 1.2153191  |
| H | -3.2643607 | -1.2450957 | -2.1512560 |
| H | -3.3091299 | 2.4808776  | 0.0000000  |
| H | -3.2643607 | -1.2450957 | 2.1512560  |
| F | -3.2970393 | 1.3447925  | -2.3313862 |
| F | -3.2500911 | -2.6952214 | 0.0000000  |
| F | -3.2970393 | 1.3447925  | 2.3313862  |

**21.**

|   |           |            |            |
|---|-----------|------------|------------|
| B | 2.3751600 | -1.2260633 | -0.8877203 |
| B | 2.3751600 | -1.2260633 | 0.8877203  |
| B | 2.3940719 | 0.4623587  | 1.4363392  |
| B | 2.4056211 | 1.5059552  | 0.0000000  |
| B | 0.8890967 | -0.4540245 | -1.4356208 |
| B | 0.8774188 | -1.4972423 | 0.0000000  |
| B | 0.8890967 | -0.4540245 | 1.4356208  |
| B | 0.9079477 | 1.2337347  | 0.8873582  |
| B | 0.9079477 | 1.2337347  | -0.8873582 |
| C | 3.1608916 | -0.0128248 | 0.0000000  |
| H | 4.2420730 | -0.0249658 | 0.0000000  |
| H | 3.0263479 | 0.7650435  | -2.3903214 |
| H | 0.2507707 | -0.7557267 | 2.3866904  |
| H | 2.9948471 | -2.0443374 | 1.4772779  |
| H | 3.0263479 | 0.7650435  | 2.3903214  |
| H | 3.0454246 | 2.5017613  | 0.0000000  |
| H | 0.2826621 | 2.0494239  | 1.4753818  |

|   |            |            |            |
|---|------------|------------|------------|
| H | 0.2826621  | 2.0494239  | -1.4753818 |
| H | 0.2507707  | -0.7557267 | -2.3866904 |
| H | 0.2317288  | -2.4899020 | 0.0000000  |
| H | 2.9948471  | -2.0443374 | -1.4772779 |
| C | 0.1278578  | 0.0209810  | 0.0000000  |
| H | -0.9506514 | 0.0328148  | 0.0000000  |
| B | 2.3940719  | 0.4623587  | -1.4363392 |
| C | -3.2719663 | -1.3948313 | 0.0000000  |
| C | -3.2799221 | -0.7017012 | -1.2013301 |
| C | -3.2953369 | 0.6853160  | -1.2013441 |
| C | -3.3029435 | 1.3784663  | 0.0000000  |
| C | -3.2953369 | 0.6853160  | 1.2013441  |
| C | -3.2799221 | -0.7017012 | 1.2013301  |
| F | -3.2909582 | 1.3472140  | -2.3442213 |
| F | -3.2462326 | -2.7152205 | 0.0000000  |
| F | -3.2909582 | 1.3472140  | 2.3442213  |
| F | -3.2616187 | -1.3633034 | -2.3442546 |
| F | -3.3053581 | 2.6991397  | 0.0000000  |
| F | -3.2616187 | -1.3633034 | 2.3442546  |

**22.**

|   |           |            |            |
|---|-----------|------------|------------|
| B | 2.2443817 | 0.8761282  | -1.4352320 |
| B | 3.2863194 | 0.8097336  | 0.0000000  |
| B | 2.2443817 | 0.8761282  | 1.4352320  |
| B | 0.5597963 | 0.9825289  | 0.8863717  |
| B | 1.2178989 | -0.5561824 | -1.4347106 |
| B | 2.9030711 | -0.6632384 | -0.8874838 |
| B | 2.9030711 | -0.6632384 | 0.8874838  |
| B | 1.2178989 | -0.5561824 | 1.4347106  |

|   |            |            |            |
|---|------------|------------|------------|
| B | 0.1748522  | -0.4916997 | 0.0000000  |
| C | 1.8285115  | 1.6770154  | 0.0000000  |
| H | 1.8973681  | 2.7560100  | 0.0000000  |
| H | -0.2085964 | 1.6618888  | -1.4771816 |
| H | 3.6743664  | -1.3412776 | 1.4769472  |
| H | 4.3277006  | 1.3730782  | 0.0000000  |
| H | 2.5936769  | 1.4840159  | 2.3896375  |
| H | -0.2085964 | 1.6618888  | 1.4771816  |
| H | 0.8686431  | -1.1634421 | 2.3894991  |
| H | -0.8631976 | -1.0563651 | 0.0000000  |
| H | 0.8686431  | -1.1634421 | -2.3894991 |
| H | 3.6743664  | -1.3412776 | -1.4769472 |
| H | 2.5936769  | 1.4840159  | -2.3896375 |
| C | 1.6352092  | -1.3567326 | 0.0000000  |
| H | 1.5659290  | -2.4357064 | 0.0000000  |
| B | 0.5597963  | 0.9825289  | -0.8863717 |
| C | -3.2419180 | 0.8613033  | -0.6937562 |
| C | -3.2419180 | 0.8613033  | 0.6937562  |
| C | -3.4656068 | -0.3190454 | 1.3879204  |
| C | -3.6894222 | -1.5000934 | 0.6939893  |
| C | -3.6894222 | -1.5000934 | -0.6939893 |
| C | -3.4656068 | -0.3190454 | -1.3879204 |
| H | -3.0608309 | 1.7824629  | -1.2354768 |
| H | -3.0608309 | 1.7824629  | 1.2354768  |
| H | -3.4605996 | -0.3196321 | 2.4719433  |
| H | -3.8612066 | -2.4230833 | 1.2363241  |
| H | -3.8612066 | -2.4230833 | -1.2363241 |
| H | -3.4605996 | -0.3196321 | -2.4719433 |



**23.**

|   |            |            |            |
|---|------------|------------|------------|
| B | -2.0617609 | 0.7806940  | 1.4348640  |
| B | -3.0924799 | 0.9410370  | 0.0000000  |
| B | -2.0617609 | 0.7806940  | -1.4348640 |
| B | -0.3945149 | 0.5211108  | -0.8868885 |
| B | -1.3696961 | -0.8395648 | 1.4348208  |
| B | -3.0372338 | -0.5799108 | 0.8869750  |
| B | -3.0372338 | -0.5799108 | -0.8869750 |
| B | -1.3696961 | -0.8395648 | -1.4348208 |
| B | -0.3400798 | -1.0005476 | 0.0000000  |
| C | -1.4822964 | 1.4725001  | 0.0000000  |
| H | -1.3151193 | 2.5408051  | 0.0000000  |
| H | 0.5003948  | 1.0188340  | 1.4793691  |
| H | -3.9358369 | -1.0757906 | -1.4770328 |
| H | -3.9879776 | 1.7158488  | 0.0000000  |
| H | -2.2703576 | 1.4484788  | -2.3898770 |
| H | 0.5003948  | 1.0188340  | -1.4793691 |
| H | -1.1596571 | -1.5072431 | -2.3896946 |
| H | 0.5499331  | -1.7802791 | 0.0000000  |
| H | -1.1596571 | -1.5072431 | 2.3896946  |
| H | -3.9358369 | -1.0757906 | 1.4770328  |
| H | -2.2703576 | 1.4484788  | 2.3898770  |
| C | -1.9497501 | -1.5315136 | 0.0000000  |
| H | -2.1158556 | -2.5999785 | 0.0000000  |
| B | -0.3945149 | 0.5211108  | 0.8868885  |
| C | 3.4416002  | 0.7385958  | 1.1775892  |
| C | 3.4473096  | 1.4606754  | 0.0000000  |
| C | 3.4416002  | 0.7385958  | -1.1775892 |
| C | 3.4344889  | -0.6422507 | -1.2147576 |

|   |           |            |            |
|---|-----------|------------|------------|
| C | 3.4302317 | -1.3002652 | 0.0000000  |
| C | 3.4344889 | -0.6422507 | 1.2147576  |
| H | 3.4460925 | 2.5414550  | 0.0000000  |
| H | 3.4197783 | -1.1830621 | -2.1505245 |
| H | 3.4197783 | -1.1830621 | 2.1505245  |
| F | 3.4101844 | -2.6338574 | 0.0000000  |
| F | 3.4326989 | 1.4071686  | 2.3316868  |
| F | 3.4326989 | 1.4071686  | -2.3316868 |

#### 24.

|   |            |            |            |
|---|------------|------------|------------|
| B | -2.0551629 | 0.7672101  | 1.4353550  |
| B | -3.0900855 | 0.8953722  | 0.0000000  |
| B | -2.0551629 | 0.7672101  | -1.4353550 |
| B | -0.3816237 | 0.5592901  | -0.8869026 |
| B | -1.3130046 | -0.8312341 | 1.4357844  |
| B | -2.9875491 | -0.6235428 | 0.8872082  |
| B | -2.9875491 | -0.6235428 | -0.8872082 |
| B | -1.3130046 | -0.8312341 | -1.4357844 |
| B | -0.2804928 | -0.9597207 | 0.0000000  |
| C | -1.4971337 | 1.4769882  | 0.0000000  |
| H | -1.3622746 | 2.5499071  | 0.0000000  |
| H | 0.4958886  | 1.0858455  | 1.4813433  |
| H | -3.8699160 | -1.1473939 | -1.4771496 |
| H | -4.0089348 | 1.6418427  | 0.0000000  |
| H | -2.2832026 | 1.4282678  | -2.3903365 |
| H | 0.4958886  | 1.0858455  | -1.4813433 |
| H | -1.0801289 | -1.4917541 | -2.3900201 |
| H | 0.6326745  | -1.7126666 | 0.0000000  |
| H | -1.0801289 | -1.4917541 | 2.3900201  |

|   |            |            |            |
|---|------------|------------|------------|
| H | -3.8699160 | -1.1473939 | 1.4771496  |
| H | -2.2832026 | 1.4282678  | 2.3903365  |
| C | -1.8710612 | -1.5408123 | 0.0000000  |
| H | -2.0031075 | -2.6140614 | 0.0000000  |
| B | -0.3816237 | 0.5592901  | 0.8869026  |
| C | 3.3509012  | 0.7565389  | 1.1999343  |
| C | 3.3213898  | 1.4478005  | 0.0000000  |
| C | 3.3509012  | 0.7565389  | -1.1999343 |
| C | 3.4082374  | -0.6275906 | -1.2002185 |
| C | 3.4375581  | -1.3186164 | 0.0000000  |
| C | 3.4082374  | -0.6275906 | 1.2002185  |
| F | 3.4709464  | -2.6407919 | 0.0000000  |
| F | 3.3045971  | 1.4183663  | 2.3440912  |
| F | 3.3045971  | 1.4183663  | -2.3440912 |
| F | 3.2432732  | 2.7685391  | 0.0000000  |
| F | 3.4145875  | -1.2908934 | 2.3442504  |
| F | 3.4145875  | -1.2908934 | -2.3442504 |
